# Supplementary material for: The Condition of Air Pollution in Kraków, Poland, in 2005–2020, with Health Risk Assessment
Source: PubMed Central journal article supplement (PMC7503758; doi:10.3390/ijerph17176063), 2020-08-20
Supplement: ijerph-17-06063-s001.pdf [file ijerph-17-06063-s001.pdf]

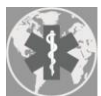

# The condition of air pollution in Kraków, Poland, in 2005-2020, with health risk assessment

Paulina Traczyk and Agnieszka Gruszecka-Kosowska <sup>1,\*</sup>

<sup>1</sup> AGH University of Science and Technology, Faculty of Geology, Geophysics and Environmental Protection, Department of Environmental Protection, Al. Mickiewicza 30, 30-059 Krakow, Poland

\* Correspondence: agnieszka.gruszecka@agh.edu.pl (A.G.-K.), p.traczyk94@gmail.com (P.T.)

---

**Figure S1.** A demonstrative wind rose in Kraków Poland: share of wind directions in % (a), and wind speed distribution in m/s (b), divided into cool and warm half-years.

**Figure S2.** Location of air-flow corridors and Regional Environmental Protection Inspectorate air monitoring stations in Kraków.

**Table S1.** Description of the air monitoring stations operated by the Regional Environmental Protection Inspectorate (REPI) in Kraków.

**Table S2.** Ranges of the 1h concentrations in the Polish air quality index (AQI) for selected pollutants.

**Table S3.** The Polish AQI index and the corresponding health recommendations for residents.

**Table S4.** Description of the enrichment indices used in the study.

**Table S5.** Exposure parameters used for the risk assessment calculations under resident scenario in the study.

**Table S6.** Toxicological parameters used for the risk assessment calculations under resident scenario in the study.

**Table S7.** Changes in annual air pollutant contents in Kraków in 2005-2020, with permissible levels.

**Table S8.** Changes in monthly air pollutant contents in 2018 in Kraków; average values of all the monitoring stations.

**Table S9.** Changes in daily air pollutant contents in a selected winter month, average values for Kraków, March 2018, with recommended concentrations.

**Table S10.** Changes in daily air pollutant contents in a selected summer month, average values for Kraków, July 2018, with recommended concentrations.

**Table S11.** Daily and hourly SO<sub>2</sub> content changes, with the hourly Polish AQI index, average values for Kraków, March 2018.

**Table S12.** Daily and hourly CO content changes, with the hourly Polish AQI index, average values for Kraków, March 2018.

**Table S13.** Changes in monthly air-pollutant contents in the first half of 2020 in Kraków, average values from all the monitoring stations.

**Table S14.** Estimated daily intake values for the resident of Kraków, in reference to exposure pathways.

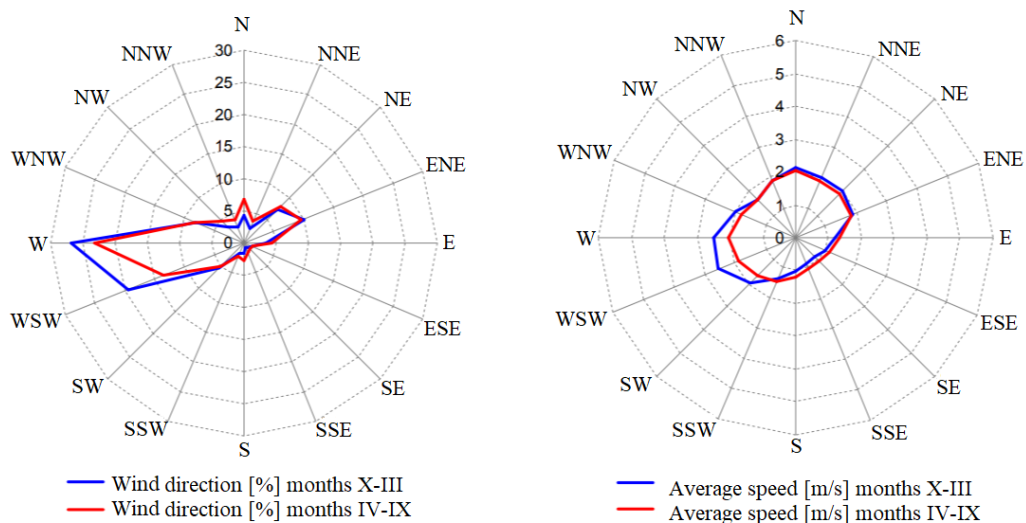

Figure S1. A demonstrative wind rose in Kraków Poland: share of wind directions in % (a), and wind speed distribution in m/s (b), divided into cool and warm half-years [1].

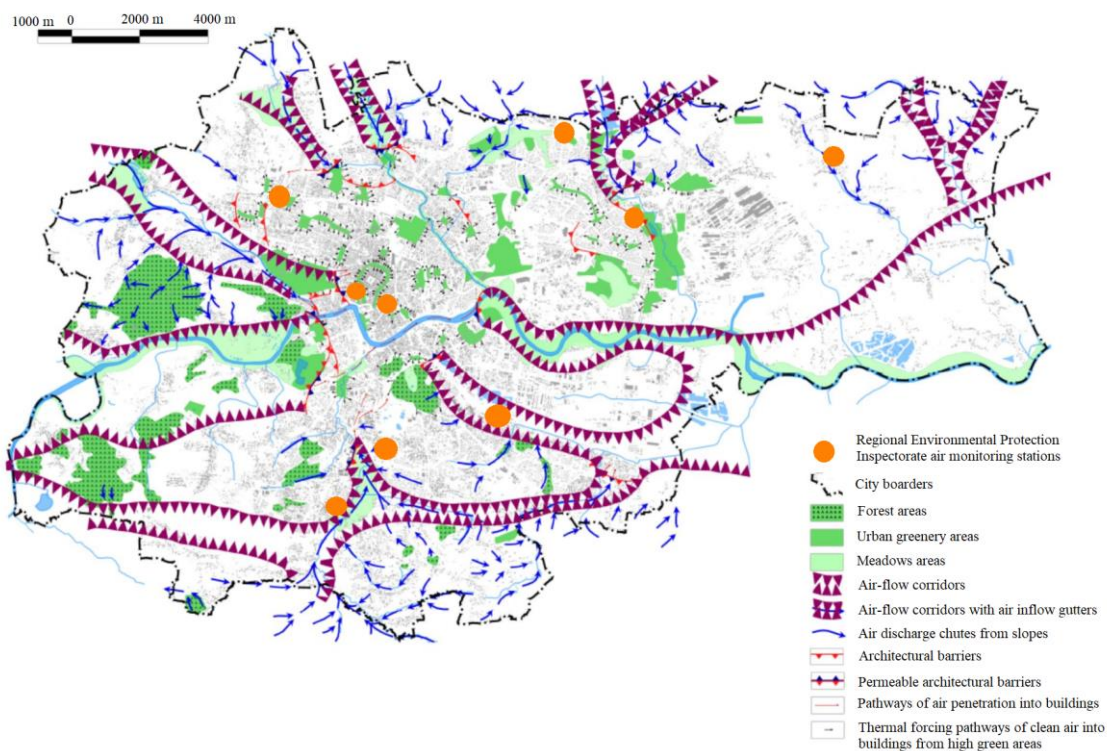

Figure S2. Location of air-flow corridors and Regional Environmental Protection Inspectorate air monitoring stations in Kraków (modified after [2]).

**Table S1.** Description of the air monitoring stations operated by the Regional Environmental Protection Inspectorate (REPI) in Kraków [3].

| No. | Station address and Code                              | Station site*       | Purpose                        | Measurement method and measured compounds                                                                                                                                                                                                                                                                                                                                                                                                                                                 |
|-----|-------------------------------------------------------|---------------------|--------------------------------|-------------------------------------------------------------------------------------------------------------------------------------------------------------------------------------------------------------------------------------------------------------------------------------------------------------------------------------------------------------------------------------------------------------------------------------------------------------------------------------------|
| 1   | Aleja Krasińskiego (PL0012A)                          | Roadside            | Public exposure assessment     | Automatic: C <sub>6</sub> H <sub>6</sub> , CO, NO, NO <sub>2</sub> , NO <sub>x</sub> , PM <sub>10</sub> , PM <sub>2.5</sub><br>Manual: C <sub>6</sub> H <sub>6</sub> , PM <sub>10</sub> , BaP(PM <sub>10</sub> )                                                                                                                                                                                                                                                                          |
| 2   | Nowa Huta (PL0039A)                                   | Industrial district | Public exposure assessment     | Automatic: C <sub>6</sub> H <sub>6</sub> , CO, NO, NO <sub>2</sub> , NO <sub>x</sub> , SO <sub>2</sub> , PM <sub>10</sub> , PM <sub>2.5</sub><br>Manual: As(PM <sub>10</sub> ), Cd(PM <sub>10</sub> ), Ni(PM <sub>10</sub> ), Pb(PM <sub>10</sub> ), PM <sub>10</sub> , C <sub>6</sub> H <sub>6</sub> , BaP(PM <sub>10</sub> )                                                                                                                                                            |
| 3   | Kraków –Kurdwanów (PL0501A)                           | City                | Public exposure assessment     | Automatic: C <sub>6</sub> H <sub>6</sub> , NO, NO <sub>2</sub> , NO <sub>x</sub> , O <sub>3</sub> , SO <sub>2</sub> , PM <sub>10</sub> , PM <sub>2.5</sub><br>Manual: As(PM <sub>10</sub> ), Cd(PM <sub>10</sub> ), Ni(PM <sub>10</sub> ), Pb(PM <sub>10</sub> ), PM <sub>10</sub> , PM <sub>2.5</sub> , C <sub>6</sub> H <sub>6</sub> , BaA(PM <sub>10</sub> ), BaP(PM <sub>10</sub> ), BbF(PM <sub>10</sub> ), BjF(PM <sub>10</sub> ), BkF(PM <sub>10</sub> ), DBahA(PM <sub>10</sub> ) |
| 4   | Kraków – ul.Dietla (MAL028)                           | Roadside            | Population exposure assessment | Automatic: NO <sub>2</sub> , NO <sub>x</sub> , NO, PM <sub>10</sub>                                                                                                                                                                                                                                                                                                                                                                                                                       |
| 5   | Kraków – os.Piastów (MAL031)                          | City                | Public exposure assessment     | Automatic: PM <sub>10</sub><br>Manual: PM <sub>10</sub> , BaP(PM <sub>10</sub> ), PM <sub>2.5</sub>                                                                                                                                                                                                                                                                                                                                                                                       |
| 6   | Kraków – ul.Złoty Róg (MAL032)                        | City                | Public exposure assessment     | Automatic: PM <sub>10</sub><br>Manual: PM <sub>10</sub> , BaP(PM <sub>10</sub> )                                                                                                                                                                                                                                                                                                                                                                                                          |
| 7   | Kraków – os.Wadów (MAL040)                            | Industrial district | Public exposure assessment     | Automatic: PM <sub>10</sub><br>Manual: PM <sub>10</sub> , BaP(PM <sub>10</sub> ), As(PM <sub>10</sub> ), Cd(PM <sub>10</sub> ), Pb(PM <sub>10</sub> ),                                                                                                                                                                                                                                                                                                                                    |
| 8   | Kraków – os.Swoszowice (PL0735A)                      | City                | Protecting human health        | Automatic: PM <sub>10</sub><br>Manual: PM <sub>10</sub> , BaP(PM <sub>10</sub> )                                                                                                                                                                                                                                                                                                                                                                                                          |
| 9   | Kraków – ul.Telimeny (MAL042)<br>closed on 30.05.2018 | City                | Public exposure assessment     | Automatic: PM <sub>10</sub><br>Manual: PM <sub>10</sub> , BaP(PM <sub>10</sub> )                                                                                                                                                                                                                                                                                                                                                                                                          |

“Station sites” are defined in the Polish law in reference to the types of specific pollutions dominating in selected locations. These determine the types of monitoring stations, based on the selection of the pollutants being measured (last column).

**Table S2.** Ranges of the 1h concentrations in the Polish air quality index (AQI) for selected pollutants [3].

| Air quality index | SO <sub>2</sub><br>[µg/m <sup>3</sup> ] | NO <sub>2</sub><br>[µg/m <sup>3</sup> ] | CO<br>[µg/m <sup>3</sup> ] | PM <sub>10</sub><br>[µg/m <sup>3</sup> ] | PM <sub>2.5</sub><br>[µg/m <sup>3</sup> ] | O <sub>3</sub><br>[µg/m <sup>3</sup> ] | C <sub>6</sub> H <sub>6</sub><br>[µg/m <sup>3</sup> ] |
|-------------------|-----------------------------------------|-----------------------------------------|----------------------------|------------------------------------------|-------------------------------------------|----------------------------------------|-------------------------------------------------------|
| Very good         | 0–50                                    | 0–40                                    | 0–3,000                    | 0–20                                     | 0–13                                      | 0–70                                   | 0–6                                                   |
| Good              | 50.1–100                                | 40.1–100                                | 3,001–7,000                | 20.1–50                                  | 13.1–35                                   | 70.1–120                               | 6.1–11                                                |
| Moderate          | 100.1–200                               | 100.1–150                               | 7,001–11,000               | 50.1–80                                  | 35.1–55                                   | 120.1–150                              | 11.1–16                                               |
| Average           | 200.1–350                               | 150.1–200                               | 11,001–15,000              | 80.1–110                                 | 55.1–75                                   | 150.1–180                              | 16.1–21                                               |
| Bad               | 350.1–500                               | 200.1–400                               | 15,001–21,000              | 110.1–150                                | 75.1–110                                  | 180.1–240                              | 21.1–51                                               |
| Very bad          | >500                                    | >400                                    | >21,000                    | >150                                     | >110                                      | >240                                   | >51                                                   |

**Table S3.** The Polish AQI index and the corresponding health recommendations for residents [3].

| Air quality index | Health recommendations                                                                                                                                                                                                       |
|-------------------|------------------------------------------------------------------------------------------------------------------------------------------------------------------------------------------------------------------------------|
| Very good         | Good air quality. Air pollution is not a threat. Ideal conditions for outdoor activities.                                                                                                                                    |
| Good              | Good air quality. Air pollution poses a minimum threat to those at risk. Very good conditions for outdoor activities.                                                                                                        |
| Moderate          | Acceptable air quality. Air pollution can pose a risk to people at risk. Good conditions for outdoor activities.                                                                                                             |
| Average           | Average air quality. Air pollution is a threat to those at risk who may experience health effects. Other people should limit spending time outdoors, especially if they experience such symptoms as coughing or sore throat. |
| Bad               | Bad air quality. People at risk should avoid going outside. Other residents should limit staying outdoors. Outdoor activities are not recommended.                                                                           |
| Very bad          | Dangerously bad air quality. People at risk should definitely avoid going outside. Others should keep exits to a minimum. All outdoor activities are discouraged.                                                            |

**Table S4.** Description of the enrichment indices used in the study [4].

| Enrichment factors                  | Formulas                                 | Explanations                                                                                                                                     | Limit values         | Classification                                      | References |
|-------------------------------------|------------------------------------------|--------------------------------------------------------------------------------------------------------------------------------------------------|----------------------|-----------------------------------------------------|------------|
| Geo-accumulation index<br>$I_{geo}$ | $I_{geo} = \log_2(C_i / 1.5 \cdot B_n)$  | $C_i$ – element content in PM; $B_n$ – background value; 1.5 – constant                                                                          | $I_{geo} \leq 0$     | Class 0 – practically uncontaminated                | [5-7]      |
|                                     |                                          |                                                                                                                                                  | $0 \leq I_{geo} < 1$ | Class 1 – uncontaminated to moderately contaminated |            |
|                                     |                                          |                                                                                                                                                  | $1 \leq I_{geo} < 2$ | Class 2 – moderately contaminated                   |            |
|                                     |                                          |                                                                                                                                                  | $2 \leq I_{geo} < 3$ | Class 3 – moderately to heavily contaminated        |            |
|                                     |                                          |                                                                                                                                                  | $3 \leq I_{geo} < 4$ | Class 4 – heavily contaminated                      |            |
|                                     |                                          |                                                                                                                                                  | $4 \leq I_{geo} < 5$ | Class 5 – heavily to extremely contaminated         |            |
| Contamination factor<br>CF          | $CF = C_{mi} / C_{ref}$                  | $C_{mi}$ – mean element concentration in PM; $C_{ref}$ – reference value of element                                                              | $CF < 1$             | low contamination                                   | [8,9]      |
|                                     |                                          |                                                                                                                                                  | $1 \leq CF < 3$      | moderate contamination                              |            |
|                                     |                                          |                                                                                                                                                  | $3 \leq CF < 6$      | considerable contamination                          |            |
|                                     |                                          |                                                                                                                                                  | $6 \leq CF$          | very high contamination                             |            |
| Enrichment factor<br>EF             | $EF = (C_i / C_{ref}) / (B_i / B_{ref})$ | $C_i$ – element content in PM; $C_{ref}$ – Fe content in sample; $B_i$ – reference content of a single element; $B_{ref}$ – Fe reference content | $EF \leq 1$          | no enrichment                                       | [10,11]    |
|                                     |                                          |                                                                                                                                                  | $1 < EF \leq 3$      | minor enrichment                                    |            |
|                                     |                                          |                                                                                                                                                  | $3 < EF \leq 5$      | moderate enrichment                                 |            |
|                                     |                                          |                                                                                                                                                  | $5 < EF \leq 10$     | moderately severe enrichment                        |            |
|                                     |                                          |                                                                                                                                                  | $10 < EF \leq 25$    | severe enrichment                                   |            |
|                                     |                                          |                                                                                                                                                  | $25 < EF \leq 50$    | very severe enrichment                              |            |
| Ecological risk index<br>ERI        | $ERI = Tr_i \times CF_i$                 | Tr – toxicity response coefficient of a single element; $CF_i$ – contamination factor of a single element                                        | $ERI < 40$           | low potential ecological risk                       | [8, 12-15] |
|                                     |                                          |                                                                                                                                                  | $40 \leq ERI < 80$   | moderate potential ecological risk                  |            |
|                                     |                                          |                                                                                                                                                  | $80 \leq ERI < 160$  | considerable potential ecological risk              |            |
|                                     |                                          |                                                                                                                                                  | $160 \leq ERI < 320$ | high potential ecological risk                      |            |
|                                     |                                          |                                                                                                                                                  | $320 \leq ERI$       | very high potential ecological risk                 |            |

---

|                                 |                                                                                    |                                                                                                                                                                     |                                                                                                                                  |                                                                                                                                                                                                                                                                                                                |         |
|---------------------------------|------------------------------------------------------------------------------------|---------------------------------------------------------------------------------------------------------------------------------------------------------------------|----------------------------------------------------------------------------------------------------------------------------------|----------------------------------------------------------------------------------------------------------------------------------------------------------------------------------------------------------------------------------------------------------------------------------------------------------------|---------|
| Modified hazard quotient<br>mHQ | $mHQ = [C_i \left( \frac{1}{TEL_i} + \frac{1}{PEL_i} + \frac{1}{SEL_i} \right)]^2$ | Ci – element<br>concentration in<br>PM; TEL –<br>threshold effect<br>level; PEL –<br>probable effect<br>level; SEL – severe<br>effect level for a<br>single element | mHQ <0.5<br>0.5 < mHQ <1.0<br>1.0 < mHQ <1.5<br>1.5 < mHQ <2.0<br>2.0 < mHQ <2.5<br>2.5 < mHQ <3.0<br>3.0 < mHQ <3.5<br>mHQ >3.5 | nil to very low severity of contamination<br>very low severity of contamination<br>low severity of contamination<br>moderate severity of contamination<br>considerable severity of contamination<br>high severity of contamination<br>very high severity of contamination<br>extreme severity of contamination | [16,17] |
|---------------------------------|------------------------------------------------------------------------------------|---------------------------------------------------------------------------------------------------------------------------------------------------------------------|----------------------------------------------------------------------------------------------------------------------------------|----------------------------------------------------------------------------------------------------------------------------------------------------------------------------------------------------------------------------------------------------------------------------------------------------------------|---------|

---

**Table S5.** Exposure parameters used for the risk assessment calculations under resident scenario in the study.

| Exposure parameters                                                | Adult                  | Child                  | References     |
|--------------------------------------------------------------------|------------------------|------------------------|----------------|
| IR <sub>ing</sub> – PM ingestion rate (mg/kg)                      | 100                    | 200                    | [18]           |
| IR <sub>inh</sub> – inhalation rate for person (m <sup>3</sup> /h) | 0.83                   | 0.31                   | [19,20]        |
| CF – unit conversion factor (kg/mg)                                | 10 <sup>-6</sup>       | 10 <sup>-6</sup>       | [18]           |
| FI – fraction ingested from a contaminated source (unitless)       | 1                      | 1                      | [21]           |
| ET – exposure time for person (h/day)                              | 24                     | 24                     | site specific* |
| ED – exposure duration (years)                                     | 24                     | 6                      | [21,22]        |
| EF – exposure frequency (days/year)                                | 350                    | 350                    | site specific* |
| EV – event frequency (events/day)                                  | 1                      | 1                      | site specific* |
| AF – soil-to-skin adherence factor (mg/cm <sup>2</sup> -event)     | 0.07                   | 0.2                    | [18]           |
| SA – skin surface area available for contact (cm <sup>2</sup> )    | 6,032                  | 2,373                  | [23]           |
| PEF – soil-to-air particulate emission factor (m <sup>3</sup> /kg) | 1.36 × 10 <sup>9</sup> | 1.36 × 10 <sup>9</sup> | [19]           |
| BW – body weight (kg)                                              | 70                     | 15                     | [18]           |
| AT – averaging time – non-carcinogens (days)                       | 8,760                  | 2,190                  | [21]           |
| AT – averaging time – carcinogens (days)                           | 25,550                 | 25,550                 | [21]           |
| AT – averaging time – non-carcinogens (hours)                      | 210,240                | 52,560                 | [24]           |
| AT – averaging time – carcinogens (hours)                          | 613,200                | 613,200                | [24]           |

\* site specific; assumption: two weeks of holidays each year

**Table S6.** Toxicological parameters used for the risk assessment calculations under resident scenario in the study.

| Toxicological parameters | RfC <sup>(1)</sup><br>mg/m <sup>3</sup> | IUR <sup>(1)</sup><br>(mg/m <sup>3</sup> ) <sup>-1</sup> | RfD <sup>(1)</sup><br>mg/kg-day        | SF <sup>(1)</sup><br>(mg/kg-day) <sup>-1</sup> | RBA <sup>(1)</sup><br>unitless | ABS <sub>d</sub> <sup>(1)</sup><br>unitless |
|--------------------------|-----------------------------------------|----------------------------------------------------------|----------------------------------------|------------------------------------------------|--------------------------------|---------------------------------------------|
| <b>Ambient air</b>       |                                         |                                                          |                                        |                                                |                                |                                             |
| SO <sub>2</sub>          | -                                       | -                                                        | -                                      | -                                              | -                              | -                                           |
| NO <sub>2</sub>          | -                                       | -                                                        | 1.10 × 10 <sup>-2</sup>                | -                                              | -                              | -                                           |
| CO                       | -                                       | -                                                        | -                                      | -                                              | -                              | -                                           |
| Benzen                   | 3.00 × 10 <sup>-2</sup>                 | 7.80 × 10 <sup>-9</sup>                                  | 4.00 × 10 <sup>-3</sup>                | 5.50 × 10 <sup>-2</sup>                        | -                              | -                                           |
| PM2.5                    | 5.00 × 10 <sup>-3</sup> <sup>(2)</sup>  | -                                                        | -                                      | -                                              | -                              | -                                           |
| PM10                     | -                                       | -                                                        | 1.10 × 10 <sup>-2</sup>                | -                                              | -                              | -                                           |
| Pb(PM10)                 | -                                       | -                                                        | 3.50 × 10 <sup>-3</sup> <sup>(3)</sup> | 4.20 × 10 <sup>-2</sup> <sup>(4)</sup>         | 1                              | -                                           |
| As(PM10)                 | 1.50 × 10 <sup>-5</sup>                 | 4.30 × 10 <sup>-6</sup>                                  | 3.00 × 10 <sup>-4</sup>                | 1.50 × 10 <sup>0</sup>                         | 0.6                            | 0.03                                        |
| Cd(PM10)                 | 1.00 × 10 <sup>-5</sup>                 | 1.80 × 10 <sup>-6</sup>                                  | 1.00 × 10 <sup>-3</sup>                | -                                              | 1                              | 0.001                                       |
| Ni(PM10)                 | 9.00 × 10 <sup>-5</sup>                 | 2.60 × 10 <sup>-10</sup>                                 | 2.00 × 10 <sup>-2</sup>                | -                                              | 1                              | 0.01                                        |
| BaP(PM10)                | 2.00 × 10 <sup>-6</sup>                 | 6.00 × 10 <sup>-7</sup>                                  | 3.00 × 10 <sup>-4</sup>                | 1.00 × 10 <sup>0</sup>                         | -                              | 0.13                                        |
| BaA(PM10)                | -                                       | 6.00 × 10 <sup>-8</sup>                                  | -                                      | 1.00 × 10 <sup>-1</sup>                        | -                              | 0.13                                        |
| BbF (PM10)               | -                                       | 6.00 × 10 <sup>-8</sup>                                  | -                                      | 1.00 × 10 <sup>-1</sup>                        | -                              | 0.13                                        |
| BjF(PM10)                | -                                       | 1.10 × 10 <sup>-7</sup>                                  | -                                      | 1.20 × 10 <sup>0</sup>                         | -                              | 0.13                                        |
| BkF(PM10)                | -                                       | 6.00 × 10 <sup>-9</sup>                                  | -                                      | 1.00 × 10 <sup>-2</sup>                        | -                              | 0.13                                        |
| DBahA(PM10)              | -                                       | 6.00 × 10 <sup>-7</sup>                                  | -                                      | 1.00 × 10 <sup>0</sup>                         | -                              | 0.13                                        |
| <b>Deposited PM</b>      |                                         |                                                          |                                        |                                                |                                |                                             |
| Al                       | 5.00 × 10 <sup>-3</sup>                 | -                                                        | 1.00 × 10 <sup>0</sup>                 | -                                              | 1                              | -                                           |
| As                       | 1.50 × 10 <sup>-5</sup>                 | 4.30 × 10 <sup>-6</sup>                                  | 3.00 × 10 <sup>-4</sup>                | 1.50 × 10 <sup>0</sup>                         | 0.6                            | 0.03                                        |
| Ba                       | 5.00 × 10 <sup>-4</sup>                 | -                                                        | 2.00 × 10 <sup>-1</sup>                | -                                              | 1                              | -                                           |
| Be                       | 2.00 × 10 <sup>-5</sup>                 | 2.40 × 10 <sup>-6</sup>                                  | 2.00 × 10 <sup>-3</sup>                | -                                              | 1                              | -                                           |
| Cd                       | 1.00 × 10 <sup>-5</sup>                 | 1.80 × 10 <sup>-6</sup>                                  | 1.00 × 10 <sup>-3</sup>                | -                                              | 1                              | 0.001                                       |
| Co                       | 6.00 × 10 <sup>-6</sup>                 | 9.00 × 10 <sup>-6</sup>                                  | 3.00 × 10 <sup>-4</sup>                | -                                              | 1                              | -                                           |
| Cr(III)                  | -                                       | -                                                        | 1.50 × 10 <sup>0</sup>                 | -                                              | 1                              | -                                           |
| Cr(VI)                   | 1.00 × 10 <sup>-4</sup>                 | 8.40 × 10 <sup>-5</sup>                                  | 3.00 × 10 <sup>-3</sup>                | 5.00 × 10 <sup>-1</sup>                        | 1                              | -                                           |
| Cu                       | -                                       | -                                                        | 4.00 × 10 <sup>-2</sup>                | -                                              | 1                              | -                                           |
| Fe                       | -                                       | -                                                        | 7.00 × 10 <sup>-1</sup>                | -                                              | 1                              | -                                           |
| Li                       | -                                       | -                                                        | 2.00 × 10 <sup>-3</sup>                | -                                              | 1                              | -                                           |
| Mn                       | 5.00 × 10 <sup>-5</sup>                 | -                                                        | 2.40 × 10 <sup>-2</sup>                | -                                              | 1                              | -                                           |
| Ni                       | 9.00 × 10 <sup>-5</sup>                 | 2.60 × 10 <sup>-10</sup>                                 | 2.00 × 10 <sup>-2</sup>                | -                                              | 1                              | 0.01                                        |
| Pb                       | -                                       | -                                                        | 3.50 × 10 <sup>-3</sup> <sup>(3)</sup> | 4.20 × 10 <sup>-2</sup> <sup>(4)</sup>         | 1                              | -                                           |
| Sn                       | -                                       | -                                                        | 6.00 × 10 <sup>-1</sup>                | -                                              | 1                              | -                                           |
| Sr                       | -                                       | -                                                        | 6.00 × 10 <sup>-1</sup>                | -                                              | 1                              | -                                           |
| V                        | 1.00 × 10 <sup>-4</sup>                 | -                                                        | 5.00 × 10 <sup>-3</sup>                | -                                              | 1                              | -                                           |
| Zn                       | -                                       | -                                                        | 3.00 × 10 <sup>-1</sup>                | -                                              | 1                              | -                                           |
| Zr                       | -                                       | -                                                        | 8.00 × 10 <sup>-5</sup>                | -                                              | 1                              | -                                           |

RfC, reference concentration; RfD, reference dose; IUR, inhalation unit risk; SF, slope factor; RBA, relative bioavailability factor; ABS<sub>d</sub>, dermal absorption factor

- not available

<sup>1</sup>[25]; <sup>2</sup>[26]; <sup>3</sup>[27]; <sup>4</sup>[28]



**Table S7.** Changes in annual air pollutant contents in Kraków in 2005–2020 [3], with permissible levels.

| Year                                | NO <sub>2</sub>   | SO <sub>2</sub>   | CO                | C <sub>6</sub> H <sub>6</sub> | O <sub>3</sub>    | PM10              | PM2.5             | As<br>(PM10)      | Cd<br>(PM10)      | Ni<br>(PM10)      | Pb<br>(PM10)      | BaP<br>(PM10)     | BaA<br>(PM10)     | BbF<br>(PM10)     | BjF<br>(PM10)     | BkF<br>(PM10)     | DBahA<br>(PM10)   |
|-------------------------------------|-------------------|-------------------|-------------------|-------------------------------|-------------------|-------------------|-------------------|-------------------|-------------------|-------------------|-------------------|-------------------|-------------------|-------------------|-------------------|-------------------|-------------------|
|                                     | µg/m <sup>3</sup> | µg/m <sup>3</sup> | µg/m <sup>3</sup> | µg/m <sup>3</sup>             | µg/m <sup>3</sup> | µg/m <sup>3</sup> | µg/m <sup>3</sup> | ng/m <sup>3</sup> | ng/m <sup>3</sup> | ng/m <sup>3</sup> | ng/m <sup>3</sup> | ng/m <sup>3</sup> | ng/m <sup>3</sup> | ng/m <sup>3</sup> | ng/m <sup>3</sup> | ng/m <sup>3</sup> | ng/m <sup>3</sup> |
| 2005                                | <b>63.0</b>       | -                 | -                 | <b>5.5</b>                    | -                 | <b>73.0</b>       | -                 | -                 | -                 | -                 | -                 | -                 | -                 | -                 | -                 | -                 | -                 |
| 2006                                | <b>66.0</b>       | -                 | -                 | <b>5.9</b>                    | -                 | <b>86.5</b>       | -                 | -                 | -                 | -                 | -                 | -                 | -                 | -                 | -                 | -                 | -                 |
| 2007                                | <b>45.5</b>       | 10.0              | 1004              | 4.5                           | -                 | <b>69.5</b>       | <b>59.0</b>       | -                 | -                 | -                 | -                 | -                 | -                 | -                 | -                 | -                 | -                 |
| 2008                                | <b>48.0</b>       | 8.0               | 685               | 3.7                           | -                 | <b>70.5</b>       | <b>38.0</b>       | -                 | -                 | -                 | -                 | -                 | -                 | -                 | -                 | -                 | -                 |
| 2009                                | <b>50.5</b>       | 9.0               | 977               | 4.0                           | -                 | <b>70.5</b>       | <b>43.0</b>       | -                 | -                 | -                 | -                 | -                 | -                 | -                 | -                 | -                 | -                 |
| 2010                                | <b>45.3</b>       | 8.5               | 997               | 4.0                           | 34                | <b>63.3</b>       | <b>45.7</b>       | -                 | -                 | -                 | -                 | -                 | -                 | -                 | -                 | -                 | -                 |
| 2011                                | <b>44.7</b>       | 8.5               | 838               | -                             | 34                | <b>65.3</b>       | <b>45.7</b>       | -                 | -                 | -                 | -                 | -                 | -                 | -                 | -                 | -                 | -                 |
| 2012                                | <b>44.7</b>       | 10.5              | 851               | -                             | 34                | <b>58.0</b>       | <b>39.3</b>       | -                 | -                 | -                 | -                 | -                 | -                 | -                 | -                 | -                 | -                 |
| 2013                                | <b>44.7</b>       | 8.5               | 833               | 3.0                           | 35                | <b>51.3</b>       | <b>36.7</b>       | -                 | -                 | -                 | -                 | -                 | -                 | -                 | -                 | -                 | -                 |
| 2014                                | 38.0              | 7.0               | 881               | 2.8                           | 33                | <b>52.7</b>       | <b>36.0</b>       | 1.37              | 0.92              | 1.89              | 0.027             | 6.9               | 3.0               | 4.2               | 4.5               | 2.7               | 1.1               |
| 2015                                | <b>41.0</b>       | 7.0               | 769               | 2.8                           | 38                | <b>54.3</b>       | <b>36.3</b>       | 2.09              | 1.19              | 1.91              | 0.033             | 7.8               | 30.               | 3.8               | 4.1               | 3.4               | 2.3               |
| 2016                                | <b>41.3</b>       | 6.0               | 701               | 2.1                           | 34                | <b>44.0</b>       | <b>32.0</b>       | 1.26              | 0.69              | 1.44              | 0.133             | 4.2               | 6.8               | 3.0               | 2.2               | 3.7               | 0.7               |
| 2017                                | <b>41.5</b>       | 7.0               | 753               | 2.2                           | 38                | <b>44.0</b>       | <b>33.0</b>       | 1.26              | 0.57              | 1.53              | 0.019             | 4.7               | 7.8               | 3.4               | 2.7               | 2.3               | 0.6               |
| 2018                                | <b>40.3</b>       | 6.0               | 693               | 2.3                           | 41                | <b>42.9</b>       | <b>31.7</b>       | 0.98              | 0.52              | 1.90              | 0.017             | 5.3               | 6.0               | 2.5               | 1.8               | 1.9               | 0.4               |
| 2019                                | 38.8              | 5.0               | 602               | 1.3                           | 40                | 34.8              | 25.0              | 0.88              | 0.46              | 1.61              | 0.013             | 4.5               | 4.4               | 2.3               | 1.7               | 1.6               | 0.3               |
| 2020                                | 35.3*             | 5.3*              | 557*              | 0.8*                          | 45*               | 34.4*             | 26.1*             | 1.27*             | 0.42*             | 1.33*             | 0.016*            | 8.5*              | 9.9*              | 4.4*              | 3.6*              | 3.2*              | 0.7*              |
| average                             | 45.5              | 7.6               | 796               | 3.2                           | 35                | 57.2              | 37.7              | 1.30              | 0.68              | 1.66              | 0.037             | 5.9               | 5.8               | 3.4               | 2.9               | 2.7               | 0.9               |
| annual<br>permissible<br>level [29] | 40                | 125               | 10,000            | 5                             | -                 | 40                | 25<br>(20**)      | 6***              | 5***              | 20***             | 500               | -                 | -                 | -                 | -                 | -                 | -                 |

- data not available; \* until the end of May 2020; \*\* since 2020; \*\*\* [30]; bold: the concentrations exceeding the recommended levels.

**Table S8.** Changes in monthly air pollutant contents in 2018 in Kraków; average values of all the monitoring stations [3].

| Month.    | NO <sub>2</sub>   | SO <sub>2</sub>   | CO                | C <sub>6</sub> H <sub>6</sub> | PM10              | PM2.5             | O <sub>3</sub>    | As                          | Cd                          | Ni                          | Pb                          | BaP                         | BaA                         | BbF                         | BjF                         | BkF                         | DBahA                       |
|-----------|-------------------|-------------------|-------------------|-------------------------------|-------------------|-------------------|-------------------|-----------------------------|-----------------------------|-----------------------------|-----------------------------|-----------------------------|-----------------------------|-----------------------------|-----------------------------|-----------------------------|-----------------------------|
|           | µg/m <sup>3</sup> | µg/m <sup>3</sup> | µg/m <sup>3</sup> | µg/m <sup>3</sup>             | µg/m <sup>3</sup> | µg/m <sup>3</sup> | µg/m <sup>3</sup> | (PM10)<br>ng/m <sup>3</sup> | (PM10)<br>ng/m <sup>3</sup> | (PM10)<br>ng/m <sup>3</sup> | (PM10)<br>ng/m <sup>3</sup> | (PM10)<br>ng/m <sup>3</sup> | (PM10)<br>ng/m <sup>3</sup> | (PM10)<br>ng/m <sup>3</sup> | (PM10)<br>ng/m <sup>3</sup> | (PM10)<br>ng/m <sup>3</sup> | (PM10)<br>ng/m <sup>3</sup> |
| January   | 40                | 8.0               | 1009              | 4.9                           | 56                | 47                | 24                | 2.03                        | 0.59                        | 1.59                        | 0.025                       | 12.1                        | 12.1                        | 3.79                        | 2.83                        | 3.57                        | 0.67                        |
| February  | 39                | 7.9               | 803               | 3.5                           | 61                | 53                | 33                | 1.51                        | 0.64                        | 1.91                        | 0.021                       | 12.7                        | 17.2                        | 5.57                        | 4.45                        | 4.48                        | 0.98                        |
| March     | 47                | 11.3              | 822               | 3.9                           | 70                | 51                | 41                | 1.45                        | 0.53                        | 1.69                        | 0.019                       | 10.7                        | 15.1                        | 5.58                        | 4.62                        | 4.32                        | 1.09                        |
| April     | 45                | 4.9               | 567               | 1.6                           | 41                | 23                | 48                | 0.57                        | 0.39                        | 2.46                        | 0.012                       | 1.77                        | 1.55                        | 1.14                        | 0.67                        | 0.73                        | 0.18                        |
| May       | 38                | 5.1               | 501               | 1.1                           | 30                | 19                | 65                | 0.50                        | 0.40                        | 2.60                        | 0.014                       | 0.61                        | 0.30                        | 0.37                        | 0.18                        | 0.20                        | 0.05                        |
| June      | 38                | 4.6               | 482               | 0.8                           | 26                | 17                | 62                | 0.50                        | 0.28                        | 1.75                        | 0.009                       | 0.22                        | 0.24                        | 0.31                        | 0.14                        | 0.16                        | 0.03                        |
| July      | 38                | 4.7               | 482               | 0.8                           | 25                | 16                | 56                | 0.50                        | 0.32                        | 1.08                        | 0.008                       | 0.19                        | 0.20                        | 0.29                        | 0.14                        | 0.15                        | 0.02                        |
| August    | 41                | 4.9               | 548               | 1.2                           | 29                | 19                | 54                | 0.53                        | 0.38                        | 2.10                        | 0.012                       | 0.55                        | 0.22                        | 0.29                        | 0.15                        | 0.15                        | 0.02                        |
| September | 41                | 4.4               | 596               | 1.2                           | 31                | 22                | 43                | 0.52                        | 0.41                        | 1.53                        | 0.013                       | 0.76                        | 0.66                        | 0.77                        | 0.39                        | 0.42                        | 0.06                        |
| October   | 43                | 4.6               | 762               | 2.3                           | 48                | 35                | 30                | 0.82                        | 0.57                        | 1.52                        | 0.019                       | 3.73                        | 2.34                        | 2.35                        | 1.45                        | 1.43                        | 0.28                        |
| November  | 37                | 5.5               | 939               | 3.6                           | 55                | 46                | 18                | 1.19                        | 0.82                        | 1.99                        | 0.024                       | 8.70                        | 8.95                        | 5.02                        | 3.12                        | 3.38                        | 0.70                        |
| December  | 39                | 7.2               | 809               | 3.0                           | 42                | 34                | 20                | 1.12                        | 0.58                        | 1.47                        | 0.016                       | 10.6                        | 12.7                        | 5.04                        | 3.79                        | 3.70                        | 0.80                        |

**Table S9.** Changes in daily air pollutant contents in a selected winter month, average values for Kraków, March 2018 [3], with recommended concentrations.

| Day                              | NO <sub>2</sub><br>[µg/m <sup>3</sup> ] | SO <sub>2</sub><br>[µg/m <sup>3</sup> ] | CO<br>[µg/m <sup>3</sup> ] | C <sub>6</sub> H <sub>6</sub><br>[µg/m <sup>3</sup> ] | O <sub>3</sub><br>[µg/m <sup>3</sup> ] | O <sub>3</sub> 8-hour<br>[µg/m <sup>3</sup> ] | PM10<br>[µg/m <sup>3</sup> ] | PM2.5<br>[µg/m <sup>3</sup> ] |
|----------------------------------|-----------------------------------------|-----------------------------------------|----------------------------|-------------------------------------------------------|----------------------------------------|-----------------------------------------------|------------------------------|-------------------------------|
| 1 March                          | 50                                      | 14                                      | 888                        | 5.5                                                   | 37                                     | 66                                            | <b>104</b>                   | <b>81</b>                     |
| 2 March                          | 40                                      | 16                                      | 825                        | 4.9                                                   | 62                                     | 86                                            | <b>99</b>                    | <b>76</b>                     |
| 3 March                          | 55                                      | 18                                      | 855                        | 5.2                                                   | 48                                     | 87                                            | <b>104</b>                   | <b>80</b>                     |
| 4 March                          | 60                                      | 19                                      | 1399                       | 7.8                                                   | 46                                     | 86                                            | <b>152</b>                   | <b>115</b>                    |
| 5 March                          | 81                                      | 21                                      | 1467                       | 9.0                                                   | 37                                     | 67                                            | <b>150</b>                   | <b>111</b>                    |
| 6 March                          | 70                                      | 17                                      | 1339                       | 7.5                                                   | 19                                     | 48                                            | <b>100</b>                   | <b>84</b>                     |
| 7 March                          | 61                                      | 12                                      | 1262                       | 7.0                                                   | 22                                     | 52                                            | <b>92</b>                    | <b>72</b>                     |
| 8 March                          | 56                                      | 10                                      | 1049                       | 3.9                                                   | 25                                     | 58                                            | <b>67</b>                    | <b>52</b>                     |
| 9 March                          | 57                                      | 11                                      | 1110                       | 5.0                                                   | 28                                     | 70                                            | <b>76</b>                    | <b>58</b>                     |
| 10 March                         | 56                                      | 11                                      | 1245                       | 6.3                                                   | 27                                     | 67                                            | <b>95</b>                    | <b>63</b>                     |
| 11 March                         | 45                                      | 9                                       | 1111                       | 4.7                                                   | 43                                     | 82                                            | <b>74</b>                    | <b>48</b>                     |
| 12 March                         | 39                                      | 9                                       | 602                        | 1.6                                                   | 58                                     | 69                                            | 39                           | 19                            |
| 13 March                         | 45                                      | 8                                       | 652                        | 1.5                                                   | 43                                     | 63                                            | 34                           | 17                            |
| 14 March                         | 47                                      | 8                                       | 797                        | 3.0                                                   | 10                                     | 19                                            | 49                           | <b>40</b>                     |
| 15 March                         | 34                                      | 7                                       | 493                        | 2.6                                                   | 23                                     | 40                                            | 43                           | <b>31</b>                     |
| 16 March                         | 31                                      | 6                                       | 615                        | 3.0                                                   | 22                                     | 36                                            | 38                           | <b>33</b>                     |
| 17 March                         | 16                                      | 5                                       | 244                        | 0.9                                                   | 74                                     | 80                                            | 22                           | 16                            |
| 18 March                         | 13                                      | 9                                       | 241                        | 0.8                                                   | 82                                     | 85                                            | 30                           | 17                            |
| 19 March                         | 27                                      | 7                                       | 414                        | 1.4                                                   | 81                                     | 85                                            | 32                           | 23                            |
| 20 March                         | 45                                      | 10                                      | 558                        | 2.5                                                   | 50                                     | 78                                            | 48                           | <b>38</b>                     |
| 21 March                         | 45                                      | 14                                      | 598                        | 2.7                                                   | 45                                     | 80                                            | <b>56</b>                    | <b>39</b>                     |
| 22 March                         | 58                                      | 12                                      | 769                        | 3.6                                                   | 37                                     | 79                                            | <b>75</b>                    | <b>40</b>                     |
| 23 March                         | 57                                      | 14                                      | 1156                       | 5.9                                                   | 29                                     | 62                                            | <b>103</b>                   | <b>75</b>                     |
| 24 March                         | 48                                      | 14                                      | 916                        | 5.0                                                   | 55                                     | 92                                            | <b>86</b>                    | <b>67</b>                     |
| 25 March                         | 50                                      | 15                                      | 791                        | 3.9                                                   | 42                                     | 93                                            | <b>76</b>                    | <b>58</b>                     |
| 26 March                         | 58                                      | 12                                      | 827                        | 3.6                                                   | 31                                     | 67                                            | <b>77</b>                    | <b>53</b>                     |
| 27 March                         | 45                                      | 9                                       | 688                        | 2.9                                                   | 26                                     | 44                                            | <b>64</b>                    | <b>48</b>                     |
| 28 March                         | 40                                      | 7                                       | 555                        | 2.3                                                   | 45                                     | 71                                            | <b>51</b>                    | <b>36</b>                     |
| 29 March                         | 53                                      | 10                                      | 756                        | 3.1                                                   | 23                                     | 51                                            | <b>59</b>                    | <b>41</b>                     |
| 30 March                         | 44                                      | 8                                       | 604                        | 2.6                                                   | 45                                     | 88                                            | 43                           | <b>31</b>                     |
| 31 March                         | 34                                      | 9                                       | 688                        | 3.2                                                   | 43                                     | 64                                            | 34                           | 25                            |
| 24h<br>permissible<br>level [29] | -                                       | 125                                     | -                          | -                                                     | -                                      | 120*                                          | 50                           | 25**                          |

\* 8h permissible level

\*\* guideline value [31]

**bold:** the concentrations exceeding the recommended levels

2 March weekend marking

**Table S10.** Changes in daily air pollutant contents in a selected summer month, average values for Kraków, July 2018 [3], with recommended concentrations.

| Day                              | NO <sub>2</sub><br>[µg/m <sup>3</sup> ] | SO <sub>2</sub><br>[µg/m <sup>3</sup> ] | CO<br>[µg/m <sup>3</sup> ] | C <sub>6</sub> H <sub>6</sub><br>[µg/m <sup>3</sup> ] | O <sub>3</sub><br>[µg/m <sup>3</sup> ] | O <sub>3</sub> 8-hour<br>[µg/m <sup>3</sup> ] | PM10<br>[µg/m <sup>3</sup> ] | PM2.5<br>[µg/m <sup>3</sup> ] |
|----------------------------------|-----------------------------------------|-----------------------------------------|----------------------------|-------------------------------------------------------|----------------------------------------|-----------------------------------------------|------------------------------|-------------------------------|
| 1 July                           | 21                                      | 3.3                                     | 360                        | 0.4                                                   | 48                                     | 55                                            | 12                           | 6                             |
| 2 July                           | 31                                      | 3.8                                     | 433                        | 0.5                                                   | 47                                     | 77                                            | 18                           | 9                             |
| 3 July                           | 44                                      | 5.1                                     | 464                        | 0.8                                                   | 52                                     | 107                                           | 24                           | 13                            |
| 4 July                           | 57                                      | 6.3                                     | 524                        | 1.0                                                   | 69                                     | <b>142</b>                                    | 29                           | 16                            |
| 5 July                           | 65                                      | 5.1                                     | 613                        | 1.1                                                   | 79                                     | <b>156</b>                                    | 34                           | 19                            |
| 6 July                           | 54                                      | 4.5                                     | 595                        | 0.9                                                   | 76                                     | <b>123</b>                                    | 32                           | 23                            |
| 7 July                           | 32                                      | 4.5                                     | 444                        | 0.5                                                   | 65                                     | 105                                           | 25                           | 15                            |
| 8 July                           | 30                                      | 4.4                                     | 398                        | 0.6                                                   | 64                                     | 102                                           | 23                           | 13                            |
| 9 July                           | 50                                      | 4.7                                     | 548                        | 1.0                                                   | 48                                     | 102                                           | 30                           | 19                            |
| 10 July                          | 45                                      | 3.8                                     | 487                        | 0.9                                                   | 58                                     | 117                                           | 29                           | 18                            |
| 11 July                          | 41                                      | 4.6                                     | 601                        | 1.3                                                   | 30                                     | 59                                            | 28                           | 20                            |
| 12 July                          | 34                                      | 4.5                                     | 442                        | 0.6                                                   | 59                                     | 92                                            | 19                           | 12                            |
| 13 July                          | 31                                      | 3.6                                     | 425                        | 0.5                                                   | 65                                     | 101                                           | 16                           | 10                            |
| 14 July                          | 24                                      | 4.1                                     | 381                        | 0.4                                                   | 66                                     | 86                                            | 20                           | 12                            |
| 15 July                          | 22                                      | 4.5                                     | 378                        | 0.5                                                   | 64                                     | 85                                            | 19                           | 12                            |
| 16 July                          | 39                                      | 5.0                                     | 524                        | 0.7                                                   | 44                                     | 70                                            | 24                           | 16                            |
| 17 July                          | 30                                      | 4.1                                     | 423                        | 0.5                                                   | 45                                     | 52                                            | 17                           | 14                            |
| 18 July                          | 27                                      | 3.8                                     | 417                        | 0.5                                                   | 39                                     | 53                                            | 13                           | 9                             |
| 19 July                          | 26                                      | 3.9                                     | 415                        | 0.5                                                   | 35                                     | 41                                            | 20                           | 17                            |
| 20 July                          | 33                                      | 4.3                                     | 515                        | 0.8                                                   | 35                                     | 68                                            | 31                           | 22                            |
| 21 July                          | 46                                      | 5.1                                     | 528                        | 1.0                                                   | 70                                     | <b>137</b>                                    | 35                           | 25                            |
| 22 July                          | 37                                      | 6.1                                     | 512                        | 1.6                                                   | 78                                     | <b>144</b>                                    | 34                           | 27                            |
| 23 July                          | 42                                      | 4.8                                     | 430                        | 0.7                                                   | 60                                     | 111                                           | 32                           | 18                            |
| 24 July                          | 45                                      | 4.0                                     | 399                        | 0.6                                                   | 77                                     | 130                                           | 34                           | 19                            |
| 25 July                          | 39                                      | 4.4                                     | 455                        | 0.8                                                   | 54                                     | 99                                            | 30                           | 17                            |
| 26 July                          | 37                                      | 4.6                                     | 480                        | 0.8                                                   | 51                                     | 78                                            | 21                           | 12                            |
| 27 July                          | 36                                      | 6.7                                     | 503                        | 0.9                                                   | 67                                     | 98                                            | 24                           | 14                            |
| 28 July                          | 37                                      | 6.1                                     | 571                        | 1.0                                                   | 54                                     | 117                                           | 26                           | 14                            |
| 29 July                          | 29                                      | 4.6                                     | 485                        | 0.6                                                   | 63                                     | 106                                           | 23                           | 14                            |
| 30 July                          | 43                                      | 4.0                                     | 584                        | 1.3                                                   | 30                                     | 69                                            | 24                           | 15                            |
| 31 July                          | 33                                      | 6.9                                     | 607                        | 1.7                                                   | 58                                     | 93                                            | 29                           | 15                            |
| 24h<br>permissible<br>level [29] | -                                       | 125                                     | -                          | -                                                     | -                                      | 120*                                          | 50                           | 25**                          |

\* 8h permissible level

\*\* guideline value [31]

**bold:** the concentrations exceeding the recommended levels

1 July weekend marking

**Table S11.** Daily and hourly SO<sub>2</sub> content changes, with the hourly Polish AQI index, average values for Kraków, March 2018 [3] (weekend marking in grey).

| SO <sub>2</sub> |    |    |    |    |    |    |    |    |    |    |    |    |    |    |    |    |    |    |    |    |    |    |    |    |    |    |    |    |    |    |    |
|-----------------|----|----|----|----|----|----|----|----|----|----|----|----|----|----|----|----|----|----|----|----|----|----|----|----|----|----|----|----|----|----|----|
| Day             | 1  | 2  | 3  | 4  | 5  | 6  | 7  | 8  | 9  | 10 | 11 | 12 | 13 | 14 | 15 | 16 | 17 | 18 | 19 | 20 | 21 | 22 | 23 | 24 | 25 | 26 | 27 | 28 | 29 | 30 | 31 |
| Hour            | 1  | 2  | 3  | 4  | 5  | 6  | 7  | 8  | 9  | 10 | 11 | 12 | 13 | 14 | 15 | 16 | 17 | 18 | 19 | 20 | 21 | 22 | 23 | 24 | 25 | 26 | 27 | 28 | 29 | 30 | 31 |
| 01:00           | 12 | 14 | 23 | 19 | 14 | 29 | 9  | 10 | 8  | 9  | 10 | 8  | 7  | 10 | 8  | 6  | 4  | 9  | 7  | 7  | 21 | 18 | 12 | 9  | 11 | 8  | 15 | 4  | 11 | 12 | 6  |
| 02:00           | 9  | 13 | 21 | 19 | 15 | 30 | 7  | 7  | 7  | 9  | 10 | 10 | 6  | 8  | 9  | 5  | 4  | 6  | 7  | 7  | 20 | 15 | 9  | 8  | 10 | 7  | 14 | 4  | 13 | 9  | 6  |
| 03:00           | 11 | 11 | 18 | 20 | 20 | 26 | 6  | 6  | 7  | 7  | 8  | 9  | 6  | 7  | 9  | 6  | 3  | 8  | 6  | 6  | 21 | 13 | 8  | 8  | 10 | 7  | 15 | 4  | 9  | 8  | 7  |
| 04:00           | 12 | 11 | 16 | 20 | 18 | 24 | 6  | 6  | 6  | 6  | 7  | 8  | 6  | 7  | 9  | 5  | 4  | 10 | 8  | 7  | 25 | 11 | 8  | 7  | 12 | 8  | 15 | 4  | 8  | 10 | 7  |
| 05:00           | 12 | 11 | 11 | 17 | 18 | 22 | 8  | 5  | 6  | 7  | 7  | 10 | 5  | 7  | 7  | 5  | 4  | 12 | 6  | 7  | 27 | 10 | 8  | 7  | 12 | 9  | 11 | 4  | 6  | 7  | 8  |
| 06:00           | 12 | 12 | 11 | 18 | 16 | 19 | 9  | 8  | 8  | 7  | 7  | 11 | 6  | 7  | 6  | 6  | 4  | 12 | 5  | 8  | 26 | 10 | 8  | 8  | 10 | 10 | 11 | 5  | 5  | 7  | 8  |
| 07:00           | 12 | 12 | 11 | 14 | 16 | 20 | 9  | 10 | 10 | 8  | 7  | 12 | 7  | 9  | 6  | 5  | 3  | 9  | 5  | 10 | 22 | 14 | 11 | 9  | 10 | 12 | 13 | 5  | 5  | 9  | 8  |
| 08:00           | 16 | 14 | 18 | 23 | 26 | 23 | 9  | 13 | 11 | 9  | 9  | 13 | 8  | 11 | 6  | 6  | 3  | 10 | 8  | 11 | 16 | 17 | 23 | 15 | 22 | 16 | 15 | 6  | 7  | 15 | 8  |
| 09:00           | 22 | 25 | 25 | 33 | 32 | 23 | 10 | 18 | 9  | 15 | 18 | 12 | 11 | 12 | 6  | 7  | 3  | 14 | 8  | 11 | 9  | 12 | 20 | 20 | 33 | 17 | 15 | 7  | 8  | 16 | 9  |
| 10:00           | 28 | 25 | 26 | 28 | 32 | 23 | 16 | 20 | 11 | 18 | 16 | 13 | 9  | 11 | 6  | 9  | 4  | 15 | 8  | 10 | 5  | 9  | 17 | 24 | 30 | 19 | 11 | 9  | 14 | 13 | 9  |
| 11:00           | 17 | 21 | 22 | 22 | 37 | 23 | 26 | 17 | 14 | 15 | 14 | 13 | 8  | 10 | 8  | 7  | 4  | 15 | 10 | 10 | 4  | 11 | 16 | 19 | 23 | 16 | 8  | 7  | 11 | 10 | 10 |
| 12:00           | 16 | 21 | 21 | 24 | 23 | 25 | 19 | 11 | 16 | 13 | 11 | 12 | 9  | 10 | 9  | 6  | 4  | 15 | 10 | 10 | 4  | 12 | 23 | 20 | 17 | 13 | 6  | 9  | 10 | 7  | 16 |
| 13:00           | 16 | 19 | 18 | 17 | 22 | 17 | 18 | 9  | 10 | 12 | 10 | 7  | 8  | 8  | 9  | 7  | 6  | 12 | 12 | 13 | 4  | 13 | 23 | 20 | 14 | 11 | 6  | 8  | 10 | 5  | 22 |
| 14:00           | 15 | 19 | 17 | 16 | 23 | 16 | 14 | 7  | 8  | 10 | 8  | 6  | 7  | 7  | 8  | 7  | 5  | 9  | 10 | 12 | 5  | 11 | 19 | 17 | 13 | 9  | 7  | 8  | 10 | 4  | 18 |
| 15:00           | 14 | 15 | 15 | 16 | 19 | 13 | 13 | 7  | 8  | 9  | 7  | 6  | 7  | 7  | 11 | 7  | 5  | 8  | 10 | 9  | 13 | 10 | 18 | 15 | 13 | 7  | 9  | 7  | 12 | 5  | 17 |
| 16:00           | 11 | 15 | 15 | 15 | 15 | 11 | 12 | 7  | 8  | 9  | 7  | 6  | 7  | 7  | 7  | 7  | 6  | 5  | 8  | 7  | 13 | 10 | 15 | 13 | 12 | 8  | 9  | 8  | 15 | 5  | 11 |
| 17:00           | 9  | 12 | 14 | 19 | 18 | 11 | 11 | 8  | 7  | 9  | 7  | 6  | 7  | 7  | 6  | 7  | 4  | 5  | 7  | 6  | 9  | 10 | 12 | 11 | 13 | 10 | 6  | 7  | 12 | 9  | 9  |
| 18:00           | 9  | 14 | 14 | 17 | 23 | 11 | 13 | 9  | 7  | 11 | 8  | 8  | 8  | 7  | 7  | 5  | 4  | 5  | 6  | 6  | 7  | 9  | 11 | 10 | 14 | 12 | 5  | 7  | 10 | 9  | 8  |
| 19:00           | 10 | 14 | 14 | 19 | 21 | 10 | 12 | 11 | 13 | 12 | 7  | 7  | 9  | 7  | 8  | 5  | 8  | 5  | 6  | 6  | 7  | 9  | 11 | 10 | 10 | 13 | 4  | 8  | 8  | 9  | 6  |
| 20:00           | 11 | 11 | 16 | 16 | 20 | 9  | 11 | 11 | 18 | 13 | 8  | 7  | 10 | 6  | 8  | 5  | 8  | 4  | 7  | 8  | 7  | 11 | 12 | 15 | 12 | 14 | 4  | 8  | 9  | 8  | 6  |
| 21:00           | 14 | 16 | 17 | 18 | 19 | 8  | 12 | 11 | 17 | 12 | 7  | 7  | 10 | 7  | 7  | 5  | 7  | 8  | 8  | 11 | 10 | 12 | 12 | 19 | 14 | 15 | 4  | 8  | 10 | 7  | 6  |
| 22:00           | 16 | 20 | 19 | 19 | 18 | 8  | 14 | 10 | 15 | 11 | 7  | 7  | 11 | 8  | 6  | 4  | 5  | 9  | 7  | 15 | 15 | 15 | 11 | 21 | 14 | 18 | 3  | 8  | 10 | 6  | 7  |
| 23:00           | 16 | 22 | 18 | 18 | 20 | 8  | 13 | 10 | 15 | 11 | 7  | 6  | 11 | 8  | 6  | 4  | 7  | 9  | 6  | 17 | 18 | 13 | 10 | 19 | 14 | 18 | 3  | 9  | 11 | 6  | 7  |
| 24:00           | 14 | 24 | 19 | 17 | 22 | 10 | 12 | 8  | 14 | 12 | 7  | 6  | 11 | 8  | 6  | 4  | 10 | 7  | 7  | 19 | 17 | 13 | 10 | 14 | 10 | 18 | 3  | 10 | 11 | 7  | 6  |

Colors refer to the following air quality index (AQI) codes: dark green – very good; green – good; yellow – moderate; orange – average; red – bad; maroon – very bad.

**Table S12.** Daily and hourly CO content changes, with the hourly Polish AQI index, average values for Kraków, March 2018 [3] (weekend marking in grey).

|     |       | CO   |      |      |      |      |      |      |      |      |      |      |     |      |      |     |     |     |     |     |     |      |      |      |      |      |      |      |     |      |      |      |
|-----|-------|------|------|------|------|------|------|------|------|------|------|------|-----|------|------|-----|-----|-----|-----|-----|-----|------|------|------|------|------|------|------|-----|------|------|------|
| Day | Hour  | 1    | 2    | 3    | 4    | 5    | 6    | 7    | 8    | 9    | 10   | 11   | 12  | 13   | 14   | 15  | 16  | 17  | 18  | 19  | 20  | 21   | 22   | 23   | 24   | 25   | 26   | 27   | 28  | 29   | 30   | 31   |
|     | 01:00 | 693  | 761  | 524  | 1937 | 1653 | 1357 | 1522 | 1141 | 1614 | 1706 | 1769 | 746 | 457  | 981  | 535 | 738 | 218 | 202 | 225 | 365 | 797  | 811  | 1820 | 1366 | 964  | 722  | 799  | 377 | 541  | 722  | 720  |
|     | 02:00 | 807  | 967  | 556  | 2071 | 1695 | 1295 | 1533 | 1257 | 1659 | 2070 | 1727 | 833 | 429  | 976  | 507 | 645 | 189 | 173 | 247 | 358 | 787  | 719  | 1872 | 1484 | 946  | 810  | 754  | 310 | 639  | 817  | 637  |
|     | 03:00 | 1004 | 872  | 606  | 2113 | 1752 | 1470 | 1402 | 1060 | 1630 | 1752 | 1747 | 765 | 391  | 942  | 601 | 581 | 166 | 167 | 267 | 365 | 855  | 670  | 1940 | 1505 | 962  | 808  | 787  | 323 | 479  | 794  | 841  |
|     | 04:00 | 1200 | 1015 | 650  | 2255 | 1721 | 1509 | 1402 | 1144 | 1633 | 1667 | 1703 | 539 | 408  | 944  | 523 | 533 | 137 | 203 | 246 | 359 | 897  | 618  | 1854 | 1517 | 1021 | 874  | 804  | 335 | 535  | 717  | 998  |
|     | 05:00 | 1240 | 1015 | 736  | 2316 | 1854 | 1526 | 1481 | 1259 | 1699 | 1675 | 1703 | 509 | 447  | 947  | 354 | 600 | 119 | 137 | 241 | 324 | 970  | 588  | 1801 | 1493 | 1398 | 1032 | 874  | 533 | 500  | 633  | 1008 |
|     | 06:00 | 1356 | 1116 | 809  | 2215 | 1793 | 1518 | 1811 | 1528 | 1790 | 1732 | 1718 | 567 | 602  | 1002 | 412 | 545 | 128 | 111 | 294 | 604 | 1093 | 645  | 1790 | 1450 | 1297 | 1090 | 1043 | 779 | 649  | 1001 | 974  |
|     | 07:00 | 1488 | 1277 | 907  | 2120 | 1891 | 1512 | 1754 | 1864 | 1911 | 1774 | 1745 | 646 | 858  | 1287 | 691 | 584 | 156 | 126 | 367 | 663 | 744  | 794  | 1750 | 1285 | 1268 | 1275 | 1181 | 897 | 663  | 1011 | 911  |
|     | 08:00 | 1880 | 1147 | 954  | 1976 | 2016 | 1467 | 1918 | 1958 | 1943 | 1907 | 1676 | 894 | 1110 | 1264 | 502 | 633 | 162 | 166 | 391 | 671 | 381  | 705  | 1706 | 1125 | 1215 | 1308 | 1191 | 748 | 886  | 801  | 872  |
|     | 09:00 | 1344 | 1281 | 855  | 1665 | 2170 | 1177 | 2126 | 1306 | 1067 | 1690 | 1255 | 958 | 689  | 1181 | 495 | 812 | 229 | 195 | 355 | 477 | 311  | 580  | 1295 | 1164 | 959  | 1093 | 1157 | 629 | 1023 | 539  | 880  |
|     | 10:00 | 844  | 1036 | 724  | 1293 | 1771 | 1348 | 2059 | 928  | 671  | 1070 | 748  | 673 | 555  | 813  | 432 | 880 | 253 | 161 | 455 | 519 | 295  | 469  | 812  | 753  | 684  | 813  | 934  | 560 | 861  | 371  | 579  |
|     | 11:00 | 525  | 862  | 607  | 758  | 1005 | 1388 | 1707 | 609  | 629  | 675  | 707  | 642 | 523  | 686  | 404 | 699 | 289 | 190 | 436 | 491 | 291  | 315  | 577  | 632  | 562  | 605  | 707  | 519 | 706  | 312  | 778  |
|     | 12:00 | 569  | 792  | 555  | 721  | 1022 | 856  | 1149 | 575  | 456  | 642  | 559  | 535 | 464  | 720  | 373 | 691 | 284 | 221 | 407 | 541 | 281  | 318  | 570  | 603  | 529  | 550  | 631  | 400 | 474  | 292  | 654  |
|     | 13:00 | 526  | 821  | 552  | 587  | 991  | 822  | 573  | 476  | 407  | 564  | 528  | 378 | 455  | 595  | 484 | 800 | 276 | 206 | 432 | 567 | 300  | 329  | 575  | 522  | 518  | 526  | 689  | 361 | 466  | 282  | 588  |
|     | 14:00 | 551  | 791  | 558  | 592  | 1002 | 911  | 581  | 478  | 385  | 518  | 535  | 393 | 480  | 439  | 351 | 842 | 288 | 221 | 411 | 529 | 264  | 323  | 599  | 441  | 480  | 527  | 518  | 398 | 545  | 337  | 525  |
|     | 15:00 | 590  | 787  | 541  | 610  | 1105 | 1375 | 635  | 510  | 434  | 566  | 532  | 415 | 496  | 428  | 366 | 967 | 307 | 300 | 515 | 512 | 328  | 391  | 554  | 426  | 509  | 495  | 543  | 499 | 573  | 353  | 431  |
|     | 16:00 | 605  | 656  | 541  | 644  | 1015 | 1384 | 703  | 542  | 405  | 572  | 541  | 451 | 595  | 675  | 391 | 838 | 269 | 297 | 561 | 498 | 337  | 421  | 552  | 416  | 579  | 526  | 452  | 484 | 587  | 394  | 291  |
|     | 17:00 | 532  | 586  | 514  | 788  | 981  | 1273 | 722  | 594  | 411  | 711  | 495  | 499 | 619  | 794  | 371 | 724 | 306 | 315 | 528 | 566 | 368  | 423  | 561  | 433  | 582  | 702  | 425  | 529 | 613  | 440  | 352  |
|     | 18:00 | 633  | 620  | 671  | 904  | 1300 | 1628 | 801  | 657  | 562  | 1000 | 642  | 582 | 670  | 654  | 426 | 503 | 369 | 353 | 637 | 570 | 434  | 599  | 655  | 485  | 737  | 751  | 427  | 681 | 715  | 498  | 454  |
|     | 19:00 | 694  | 651  | 784  | 1055 | 1329 | 1225 | 940  | 752  | 678  | 901  | 806  | 486 | 690  | 643  | 467 | 444 | 312 | 321 | 524 | 674 | 419  | 810  | 717  | 528  | 710  | 846  | 552  | 711 | 891  | 567  | 501  |
|     | 20:00 | 879  | 530  | 1076 | 1159 | 1476 | 1259 | 1083 | 809  | 984  | 1060 | 1049 | 540 | 748  | 674  | 690 | 385 | 316 | 399 | 557 | 756 | 546  | 1234 | 921  | 731  | 665  | 893  | 531  | 652 | 1068 | 747  | 559  |
|     | 21:00 | 799  | 572  | 1372 | 1408 | 1360 | 1595 | 1117 | 1149 | 1053 | 1371 | 1297 | 614 | 829  | 620  | 859 | 347 | 290 | 376 | 512 | 756 | 797  | 1448 | 1025 | 765  | 767  | 1054 | 495  | 626 | 1366 | 736  | 552  |
|     | 22:00 | 826  | 533  | 1743 | 1307 | 1447 | 1695 | 1121 | 1372 | 1270 | 1344 | 1296 | 554 | 984  | 611  | 624 | 355 | 291 | 273 | 496 | 787 | 980  | 1610 | 1021 | 980  | 631  | 938  | 396  | 761 | 1388 | 780  | 737  |
|     | 23:00 | 907  | 567  | 1800 | 1497 | 1501 | 1552 | 1092 | 1551 | 1620 | 1573 | 1126 | 617 | 1108 | 669  | 563 | 339 | 241 | 398 | 439 | 826 | 960  | 1734 | 1410 | 1019 | 687  | 823  | 305  | 676 | 1194 | 788  | 863  |
|     | 24:00 | 816  | 555  | 1891 | 1568 | 1490 | 1373 | 1063 | 1657 | 1725 | 1772 | 762  | 619 | 1042 | 575  | 586 | 276 | 271 | 264 | 388 | 728 | 924  | 1904 | 1364 | 854  | 716  | 782  | 317  | 538 | 775  | 685  | 803  |

Colors refer to the following air quality index (AQI) codes: dark green – very good; green – good; yellow – moderate; orange – average; red – bad; maroon – very bad.

**Table S13.** Changes in monthly air-pollutant contents in the first half of 2020 in Kraków, average values from all the monitoring stations [3].

| Month    | NO <sub>2</sub>   | SO <sub>2</sub>   | CO                | C <sub>6</sub> H <sub>6</sub> | PM10              | PM2.5             | O <sub>3</sub>    | As                          | Cd                          | Ni                          | Pb                          | BaP                         | BaA                         | BbF                         | BjF                         | BkF                         | DBahA                       |
|----------|-------------------|-------------------|-------------------|-------------------------------|-------------------|-------------------|-------------------|-----------------------------|-----------------------------|-----------------------------|-----------------------------|-----------------------------|-----------------------------|-----------------------------|-----------------------------|-----------------------------|-----------------------------|
|          | µg/m <sup>3</sup> | µg/m <sup>3</sup> | µg/m <sup>3</sup> | µg/m <sup>3</sup>             | µg/m <sup>3</sup> | µg/m <sup>3</sup> | µg/m <sup>3</sup> | (PM10)<br>ng/m <sup>3</sup> | (PM10)<br>ng/m <sup>3</sup> | (PM10)<br>ng/m <sup>3</sup> | (PM10)<br>ng/m <sup>3</sup> | (PM10)<br>ng/m <sup>3</sup> | (PM10)<br>ng/m <sup>3</sup> | (PM10)<br>ng/m <sup>3</sup> | (PM10)<br>ng/m <sup>3</sup> | (PM10)<br>ng/m <sup>3</sup> | (PM10)<br>ng/m <sup>3</sup> |
| January  | 43                | 7.75              | 842               | 1.57                          | 53                | 47                | 21                | 1.66                        | 0.55                        | 1.74                        | 0.022                       | 11.6                        | 14.5                        | 6.30                        | 5.31                        | 4.48                        | 1.02                        |
| February | 39                | 5.05              | 563               | 0.70                          | 27                | 21                | 41                | 0.87                        | 0.28                        | 0.91                        | 0.01                        | 5.29                        | 5.27                        | 2.43                        | 1.92                        | 1.75                        | 0.37                        |
| March    | 35                | 5.25              | 528               | 0.70                          | 37                | 28                | 49                | -                           | -                           | -                           | -                           | 5.73                        | -                           | -                           | -                           | -                           | -                           |
| April    | 32                | 5.00              | 407               | 0.47                          | 33                | 22                | 62                | -                           | -                           | -                           | -                           | -                           | -                           | -                           | -                           | -                           | -                           |
| May      | 28                | 3.60              | 376               | 0.40                          | 21                | 14                | 51                | -                           | -                           | -                           | -                           | -                           | -                           | -                           | -                           | -                           | -                           |

- data not available







|    |                       |                       |                       |                       |
|----|-----------------------|-----------------------|-----------------------|-----------------------|
| Pb | $1.45 \times 10^{-6}$ | $1.45 \times 10^{-6}$ | $5.17 \times 10^{-7}$ | $1.24 \times 10^{-7}$ |
| Sn | $2.12 \times 10^{-7}$ | $2.12 \times 10^{-7}$ | $7.56 \times 10^{-8}$ | $1.81 \times 10^{-8}$ |
| Sr | $2.38 \times 10^{-6}$ | $2.38 \times 10^{-6}$ | $8.50 \times 10^{-7}$ | $2.04 \times 10^{-7}$ |
| V  | $5.08 \times 10^{-7}$ | $5.08 \times 10^{-7}$ | $1.82 \times 10^{-7}$ | $4.35 \times 10^{-8}$ |
| Zn | $9.85 \times 10^{-5}$ | $9.85 \times 10^{-5}$ | $3.52 \times 10^{-5}$ | $8.44 \times 10^{-6}$ |
| Zr | $7.70 \times 10^{-8}$ | $7.70 \times 10^{-8}$ | $2.75 \times 10^{-8}$ | $6.60 \times 10^{-9}$ |

|         | ADD <sub>inh non-canc</sub><br>(mg/kg-day) |                        | ADD <sub>inh canc</sub> (mg/kg-day) |                        | ADD <sub>ing non-canc</sub><br>(mg/kg-day) |                       | ADD <sub>ing canc</sub><br>(mg/kg-day) |                       | ADD <sub>derm non-canc</sub><br>(mg/kg-day) |                       | ADD <sub>derm canc</sub><br>(mg/kg-day) |                       |
|---------|--------------------------------------------|------------------------|-------------------------------------|------------------------|--------------------------------------------|-----------------------|----------------------------------------|-----------------------|---------------------------------------------|-----------------------|-----------------------------------------|-----------------------|
|         | adult                                      | child                  | adult                               | child                  | adult                                      | child                 | adult                                  | child                 | adult                                       | child                 | adult                                   | child                 |
| Al      | $1.28 \times 10^{-6}$                      | $2.98 \times 10^{-6}$  | $4.39 \times 10^{-7}$               | $2.56 \times 10^{-7}$  | $8.70 \times 10^{-3}$                      | $8.12 \times 10^{-2}$ | $2.98 \times 10^{-3}$                  | $6.96 \times 10^{-3}$ | $3.67 \times 10^{-2}$                       | $1.93 \times 10^{-1}$ | $1.26 \times 10^{-2}$                   | $1.65 \times 10^{-2}$ |
| As      | $2.95 \times 10^{-9}$                      | $6.89 \times 10^{-9}$  | $1.01 \times 10^{-9}$               | $5.90 \times 10^{-10}$ | $1.19 \times 10^{-5}$                      | $1.05 \times 10^{-4}$ | $4.07 \times 10^{-6}$                  | $9.03 \times 10^{-6}$ | $2.54 \times 10^{-6}$                       | $1.33 \times 10^{-5}$ | $8.72 \times 10^{-7}$                   | $1.14 \times 10^{-6}$ |
| Ba      | $2.25 \times 10^{-8}$                      | $5.24 \times 10^{-8}$  | $7.70 \times 10^{-9}$               | $4.49 \times 10^{-9}$  | $1.48 \times 10^{-4}$                      | $1.26 \times 10^{-3}$ | $5.09 \times 10^{-5}$                  | $1.08 \times 10^{-4}$ | $6.45 \times 10^{-4}$                       | $3.38 \times 10^{-3}$ | $2.21 \times 10^{-4}$                   | $2.90 \times 10^{-4}$ |
| Be      | $1.09 \times 10^{-10}$                     | $2.54 \times 10^{-10}$ | $3.73 \times 10^{-11}$              | $2.18 \times 10^{-11}$ | $7.09 \times 10^{-7}$                      | $5.75 \times 10^{-6}$ | $2.43 \times 10^{-7}$                  | $4.93 \times 10^{-7}$ | $3.12 \times 10^{-6}$                       | $1.64 \times 10^{-5}$ | $1.07 \times 10^{-6}$                   | $1.40 \times 10^{-6}$ |
| Cd      | $2.32 \times 10^{-10}$                     | $5.41 \times 10^{-10}$ | $7.94 \times 10^{-11}$              | $4.63 \times 10^{-11}$ | $1.49 \times 10^{-6}$                      | $1.16 \times 10^{-5}$ | $5.11 \times 10^{-7}$                  | $9.95 \times 10^{-7}$ | $6.65 \times 10^{-9}$                       | $3.49 \times 10^{-8}$ | $2.28 \times 10^{-9}$                   | $2.99 \times 10^{-9}$ |
| Co      | $4.73 \times 10^{-10}$                     | $1.10 \times 10^{-9}$  | $1.62 \times 10^{-10}$              | $9.47 \times 10^{-11}$ | $3.00 \times 10^{-6}$                      | $2.25 \times 10^{-5}$ | $1.03 \times 10^{-6}$                  | $1.93 \times 10^{-6}$ | $1.36 \times 10^{-5}$                       | $7.13 \times 10^{-5}$ | $4.66 \times 10^{-6}$                   | $6.11 \times 10^{-6}$ |
| Cr(III) | $1.81 \times 10^{-8}$                      | $4.23 \times 10^{-8}$  | $6.22 \times 10^{-9}$               | $3.63 \times 10^{-9}$  | $1.14 \times 10^{-4}$                      | $8.22 \times 10^{-4}$ | $3.89 \times 10^{-5}$                  | $7.05 \times 10^{-5}$ | $5.21 \times 10^{-4}$                       | $2.73 \times 10^{-3}$ | $1.78 \times 10^{-4}$                   | $2.34 \times 10^{-4}$ |
| Cr(VI)  | $1.81 \times 10^{-8}$                      | $4.23 \times 10^{-8}$  | $6.22 \times 10^{-9}$               | $3.63 \times 10^{-9}$  | $1.12 \times 10^{-4}$                      | $7.85 \times 10^{-4}$ | $3.84 \times 10^{-5}$                  | $6.72 \times 10^{-5}$ | $5.21 \times 10^{-4}$                       | $2.73 \times 10^{-3}$ | $1.78 \times 10^{-4}$                   | $2.34 \times 10^{-4}$ |
| Cu      | $2.51 \times 10^{-8}$                      | $5.85 \times 10^{-8}$  | $8.60 \times 10^{-9}$               | $5.02 \times 10^{-9}$  | $1.53 \times 10^{-4}$                      | $1.04 \times 10^{-3}$ | $5.25 \times 10^{-5}$                  | $8.90 \times 10^{-5}$ | $7.20 \times 10^{-4}$                       | $3.78 \times 10^{-3}$ | $2.47 \times 10^{-4}$                   | $3.24 \times 10^{-4}$ |
| Fe      | $8.15 \times 10^{-6}$                      | $1.90 \times 10^{-5}$  | $2.79 \times 10^{-6}$               | $1.63 \times 10^{-6}$  | $4.91 \times 10^{-2}$                      | $3.23 \times 10^{-1}$ | $1.68 \times 10^{-2}$                  | $2.77 \times 10^{-2}$ | $2.34 \times 10^{-1}$                       | $1.23 \times 10^0$    | $8.02 \times 10^{-2}$                   | $1.05 \times 10^{-1}$ |
| Li      | $4.25 \times 10^{-9}$                      | $9.92 \times 10^{-9}$  | $1.46 \times 10^{-9}$               | $8.50 \times 10^{-10}$ | $2.53 \times 10^{-5}$                      | $1.62 \times 10^{-4}$ | $8.67 \times 10^{-6}$                  | $1.39 \times 10^{-5}$ | $1.22 \times 10^{-4}$                       | $6.40 \times 10^{-4}$ | $4.18 \times 10^{-5}$                   | $5.49 \times 10^{-5}$ |
| Mn      | $1.26 \times 10^{-7}$                      | $2.93 \times 10^{-7}$  | $4.31 \times 10^{-8}$               | $2.51 \times 10^{-8}$  | $7.38 \times 10^{-4}$                      | $4.60 \times 10^{-3}$ | $2.53 \times 10^{-4}$                  | $3.94 \times 10^{-4}$ | $3.61 \times 10^{-3}$                       | $1.89 \times 10^{-2}$ | $1.24 \times 10^{-3}$                   | $1.62 \times 10^{-3}$ |
| Ni      | $4.93 \times 10^{-9}$                      | $1.15 \times 10^{-8}$  | $1.69 \times 10^{-9}$               | $9.85 \times 10^{-10}$ | $2.86 \times 10^{-5}$                      | $1.74 \times 10^{-4}$ | $9.80 \times 10^{-6}$                  | $1.49 \times 10^{-5}$ | $1.41 \times 10^{-6}$                       | $7.42 \times 10^{-6}$ | $4.85 \times 10^{-7}$                   | $6.36 \times 10^{-7}$ |
| Pb      | $1.72 \times 10^{-8}$                      | $4.02 \times 10^{-8}$  | $5.91 \times 10^{-9}$               | $3.44 \times 10^{-9}$  | $9.88 \times 10^{-5}$                      | $5.86 \times 10^{-4}$ | $3.39 \times 10^{-5}$                  | $5.02 \times 10^{-5}$ | $4.95 \times 10^{-4}$                       | $2.59 \times 10^{-3}$ | $1.70 \times 10^{-4}$                   | $2.22 \times 10^{-4}$ |
| Sn      | $2.52 \times 10^{-9}$                      | $5.88 \times 10^{-9}$  | $8.63 \times 10^{-10}$              | $5.04 \times 10^{-10}$ | $1.43 \times 10^{-5}$                      | $8.27 \times 10^{-5}$ | $4.89 \times 10^{-6}$                  | $7.09 \times 10^{-6}$ | $7.23 \times 10^{-5}$                       | $3.79 \times 10^{-4}$ | $2.48 \times 10^{-5}$                   | $3.25 \times 10^{-5}$ |
| Sr      | $2.83 \times 10^{-8}$                      | $6.60 \times 10^{-8}$  | $9.70 \times 10^{-9}$               | $5.66 \times 10^{-9}$  | $1.59 \times 10^{-4}$                      | $8.98 \times 10^{-4}$ | $5.43 \times 10^{-5}$                  | $7.70 \times 10^{-5}$ | $8.13 \times 10^{-4}$                       | $4.26 \times 10^{-3}$ | $2.79 \times 10^{-4}$                   | $3.65 \times 10^{-4}$ |
| V       | $6.04 \times 10^{-9}$                      | $1.41 \times 10^{-8}$  | $2.07 \times 10^{-9}$               | $1.21 \times 10^{-9}$  | $3.35 \times 10^{-5}$                      | $1.86 \times 10^{-4}$ | $1.15 \times 10^{-5}$                  | $1.59 \times 10^{-5}$ | $1.74 \times 10^{-4}$                       | $9.10 \times 10^{-4}$ | $5.95 \times 10^{-5}$                   | $7.80 \times 10^{-5}$ |
| Zn      | $1.17 \times 10^{-6}$                      | $2.74 \times 10^{-6}$  | $4.02 \times 10^{-7}$               | $2.34 \times 10^{-7}$  | $6.41 \times 10^{-3}$                      | $3.49 \times 10^{-2}$ | $2.20 \times 10^{-3}$                  | $2.99 \times 10^{-3}$ | $3.37 \times 10^{-2}$                       | $1.77 \times 10^{-1}$ | $1.15 \times 10^{-2}$                   | $1.51 \times 10^{-2}$ |
| Zr      | $9.17 \times 10^{-10}$                     | $2.14 \times 10^{-9}$  | $3.14 \times 10^{-10}$              | $1.83 \times 10^{-10}$ | $4.96 \times 10^{-6}$                      | $2.64 \times 10^{-5}$ | $1.70 \times 10^{-6}$                  | $2.27 \times 10^{-6}$ | $2.63 \times 10^{-5}$                       | $1.38 \times 10^{-4}$ | $9.02 \times 10^{-6}$                   | $1.18 \times 10^{-5}$ |

– not applicable to the available data

## References

1. Ośródk, L.; Godłowska, J.; Hajto, M.; Rozwoda, W.; Wojtylak, M. Determining the anemological conditions for the area of Kraków on the basis of data from the Institute of Meteorology and Water Management observation and measurement network (in Polish). Krakowski Holding Komunalny S.A. 2010. [http://archiwum.dialogspoleczny.krakow.pl/files/objects/2061/35/Za%C4%B9%E2%80%9A%C3%84%E2%80%A6cznik%20nr%201%20-%20Analiza%20anemologiczna\\_09.02%20site.pdf](http://archiwum.dialogspoleczny.krakow.pl/files/objects/2061/35/Za%C4%B9%E2%80%9A%C3%84%E2%80%A6cznik%20nr%201%20-%20Analiza%20anemologiczna_09.02%20site.pdf). (Accessed on 21 July 2020).
2. *Change in the Study of Conditions and Directions for Spatial Development of the City of Krakow*. Volume 1: Determinants; Urząd Miasta Krakowa: Kraków, Poland, 2013. [https://www.bip.krakow.pl/?dok\\_id=62484](https://www.bip.krakow.pl/?dok_id=62484). (Accessed on 21 July 2020).
3. Regional Environmental Protection Inspectorate in Kraków, Poland. Wojewódzki Inspektorat Ochrony Środowiska w Krakowie. Available online: <http://Krakow.pios.gov.pl/> (Accessed on 26 May 2020).
4. Gruszecka-Kosowska, A. Deposited particulate matter enrichment in heavy metals and related health risk: A case study of Kraków, Poland. *Proceedings*, **2020**, *44*(1), 1–7. doi: 10.3390/IECEHS-2-06373.
5. Müller, G. Index of geoaccumulation in sediments of the Rhine River, *GeoJournal* **1969**, *2*(3), 108–118.
6. Loska, K.; Wiechuła, D.; Korus, I. Metal contamination of farming soils affected by industry. *Environ Int* **2004**, *30*, 159–165.
7. Sutherland, R.A. (2000). Bed sediment-associated trace metals in an urban stream, Oahu, Hawaii. *Environ Geol* **2000**, *39*(6), 611–627.
8. Ho, H.H.; Swennen, R.; Van Damme, A. Distribution and contamination status of heavy metals in estuarine sediments near Cua Ong Harbo, Ha Long Bay, Vietnam. *Geol Belg* **2010**, *13*(1-2), 37–47.
9. Gong, Q.; Deng, J. Calculating pollution indices by heavy metals in ecological geochemistry assessment and as case study in parks of Beijing. *J China Univ Geosci* **2008**, *19*(3), 230–241.
10. Chai, L.; Li, H.; Yang, Z.; Min, X.; Liao, Q.; Liu, Y.; Men, S.; Yan, Y.; Xu, J. Heavy metals and metalloids in the surface sediments of the Xiangjiang River, Hunan, China: distribution, contamination, and ecological risk assessment. *Environ Sci Pollut Res* **2017**, *24*, 874–885.
11. Liu, Y., Wang, Q., Zhuang, W., Yuan, Y., Jiao, K., Wang, M., & Chen, Q. (2018). Calculation of thallium's toxicity coefficient in the evaluation of potential ecological risk index: a case study. *Chemosphere* **2018**, *194*, 562–569.
12. Wang, N., Wang, A., Kong, L., & He, M. (2018). Calculation and application of Sb toxicity coefficient for potential ecological risk assessment. *Sci Total Environ* **2018**, *610–611*, 167–174.
13. Benson, N.U.; Adedapo, A.E.; Omowunmi, H.F.A.; Williams, A.B.; Udosen, E.D.; Ayejuyo, O.O.; Olajire, A.A. New ecological risk indices for evaluating heavy metals contamination in aquatic sediment: A case study of the Gulf of Guinea. *Regional Studies in Marine Science* **2018**, *18*, 44–56.
14. MacDonald, D.D.; Ingersoll, C.G.; Berger, T.A. Development and evaluation of consensus-based sediment quality guidelines for freshwater ecosystems. *Arch Environ Con Tox* **2000**, *39*, 20–31.
15. Kabata-Pendias, A. *Trace elements in soils and plants (4th ed.)*. Boca Raton: CRC Press, Taylor & Francis Group, 2011.
16. Håkanson, L. An ecological risk index for aquatic pollution control. A sedimentological approach. *Water Res* **1980**, *14*, 975–1001.
17. Rudnick, R.; Gao, S. Composition of the Continental Crust. In *Treatise on Geochemistry 2nd Edition*; Elsevier Science: Oxford, UK; San Diego, CA, USA: Elsevier Pergamon, **2014**.
18. *Exposure Factors Handbook: 2011 Edition*. National Center for Environmental Assessment, Washington, DC; US Environmental Protection Agency, 2011, EPA/600/R-09/052F.
19. *Supplemental guidance for developing soil screening levels for superfund sites*. Office of Emergency and Remedial Response. US Environmental Protection Agency, 2002, Washington, DC, USA, OSWER 9355, 4–24.
20. *Child-specific Exposure Factors Handbook*. National Center for Environmental Assessment Office of Research and Development. Washington, DC; US Environmental Protection Agency, 2008, EPA/600/R-06/096F.
21. *Risk assessment guidance for superfund, Vol. 3: Part A, Process for conducting probabilistic risk assessment*. Office of Emergency and Remedial Response, US Environmental Protection Agency, 2001, Washington, DC, USA.
22. Weisło, E.; Bronder, J.; Bubak, A.; Rodríguez-Valdés, E.; Gallego, J.L.R. Human health risk assessment in restoring safe and productive use of abandoned contaminated sites. *Environ Int* **2016**, *94*, 436–448.
23. *Human Health Evaluation Manual, Supplemental Guidance: Update of Standard Default Exposure Factors*. Office of Solid Waste and Emergency Response, US Environmental Protection Agency, 2014, Washington, DC.

24. *Risk Assessment Guidance for Superfund Volume I: Human Health Evaluation Manual (Part F, Supplemental Guidance for Inhalation Risk Assessment)*, Final. Office of Superfund Remediation and Technology Innovation, OSWER Directive 9285.7-82, EPA-540-R-070-002, US Environmental Protection Agency, 2009, Washington, DC, USA.
25. *Regional Screening Level (RSL) Summary Table (TR=1E-06, HQ=1)* May 2020. US Environmental Protection Agency 2020, Washington DC, USA.
26. de Oliveira, B.F.A.; Ignotti, E.; Artaxo, P.; do Nascimento Saldiva, P.H.; Junger, W.L.; Hacon, S. Risk assessment of PM<sub>2.5</sub> to child residents in Brazilian Amazon region with biofuel production. *Environ Health* **2012**, *11*:64.
27. Taiwo, A.M.; Awomeso, J.A.; Taiwo, O.T. Oremodu, B.D.; Akintunde, O.O.; Ojo, N.O.; Elegbede, O.O.; Olanrewaju, H.H.; Arowolo, T.A. Assessment of health risks associated with road dusts in major traffic hotspots in Abeokuta metropolis, Ogun state, southwestern Nigeria. *Stoch Environ Res Risk Assess* **2017**, *31*(2), 431–447.
28. Office of environmental health hazard assessment assessments. California Environmental Protection Agency, Office of Environmental Health Hazard Assessment, Oakland, CA., 2016. <http://oehha.ca.gov/chemicals>.
29. Regulation of the Minister of the Environment concerning the levels of certain substances in the air of 24 August 2012 (*OJ* 2012, Item 1031, in Polish). <http://isap.sejm.gov.pl/isap.nsf/DocDetails.xsp?id=WDU20120001031>.
30. Goddard, S.L.; Williams, K.R.; Robins, C.; Butterfield, D.M.; Brown, R.J.C. Concentration trends of metals in ambient air in the UK: a review. *Environ Monit Assess* **2019**, *191*, 683.
31. Air quality in Europe — 2019 report. *EEA Report No 10/2019*; Publications Office of the European Union, Luxembourg 2019.

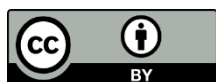

© 2020 by the authors. Submitted for possible open access publication under the terms and conditions of the Creative Commons Attribution (CC BY) license (<http://creativecommons.org/licenses/by/4.0/>).
